# Supplementary material for: Limited Impact of the Protein Corona on the Cellular Uptake of PEGylated Zein Micelles by Melanoma Cancer Cells
Source: MDPI journal article supplement (doi:10.3390/pharmaceutics14020439), 2022-02-18
Supplement: s1 [file s1]

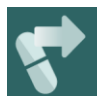

---

# **Supplementary Materials: Limited Impact of the Protein Corona on the Cellular Uptake of PEGylated Zein Micelles by Melanoma Cancer Cells**

Jitkasem Meewan , Sukrut Somani , Partha Laskar , Craig Irving , Margaret Mullin , Stuart Woods ,  
Craig W. Roberts , Abdullah R. Alzahrani , Valerie A. Ferro , Suzanne McGill , Stefan Weidt ,  
Richard Burchmore and Christine Dufès

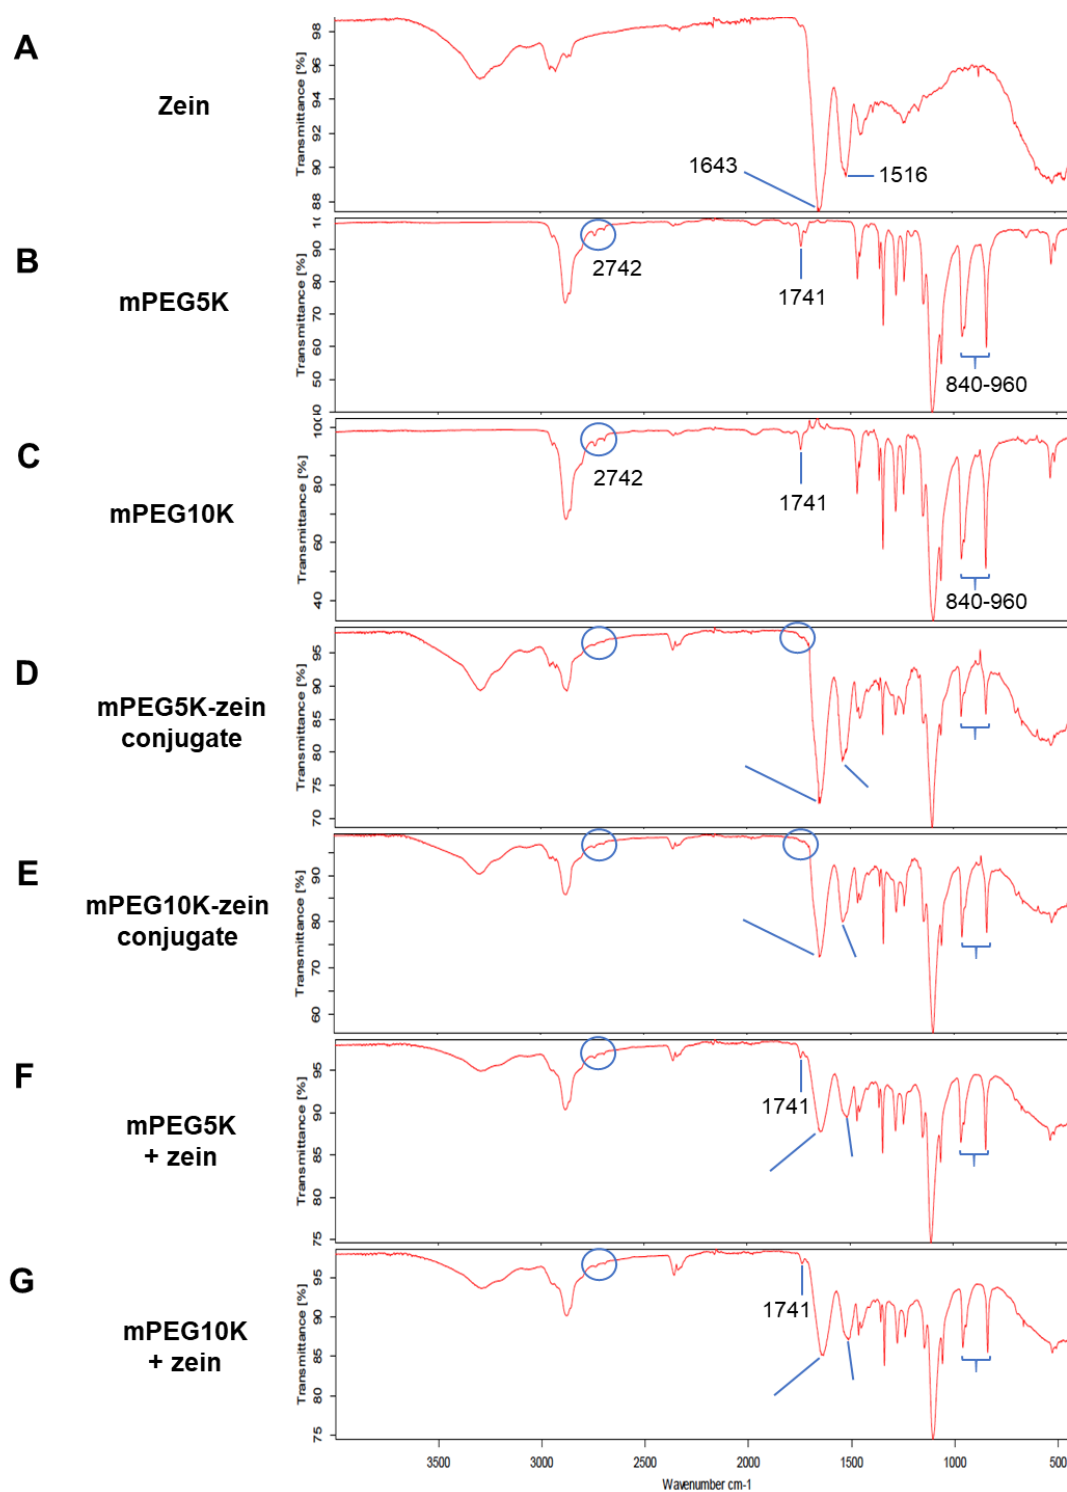

**Figure S1.** FTIR spectra of zein (A), mPEG5K (B), mPEG10K (C), mPEG5K-zein conjugate (D), mPEG10K-zein conjugate (E), non-conjugated mixture of mPEG5K with zein (F), and non-conjugated mixture of mPEG10K with zein (G).

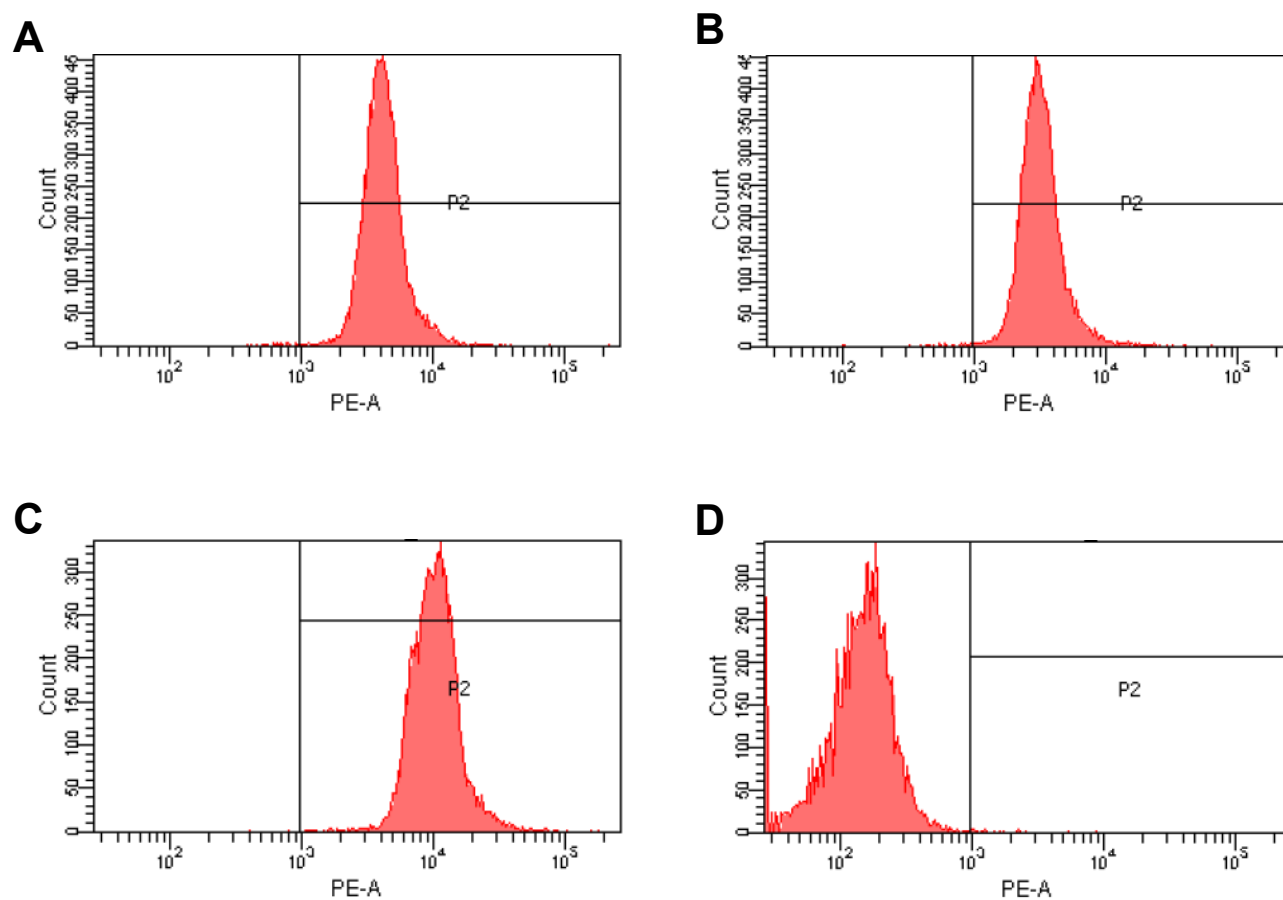

**Figure S2.** Flow cytometry histograms of B16-F10-luc-G5 cells following 2-h incubation with Nile red loaded in mPEG5K-zein (A) and mPEG10K-zein (B) micelles, Nile red solution (C), or left untreated (D).

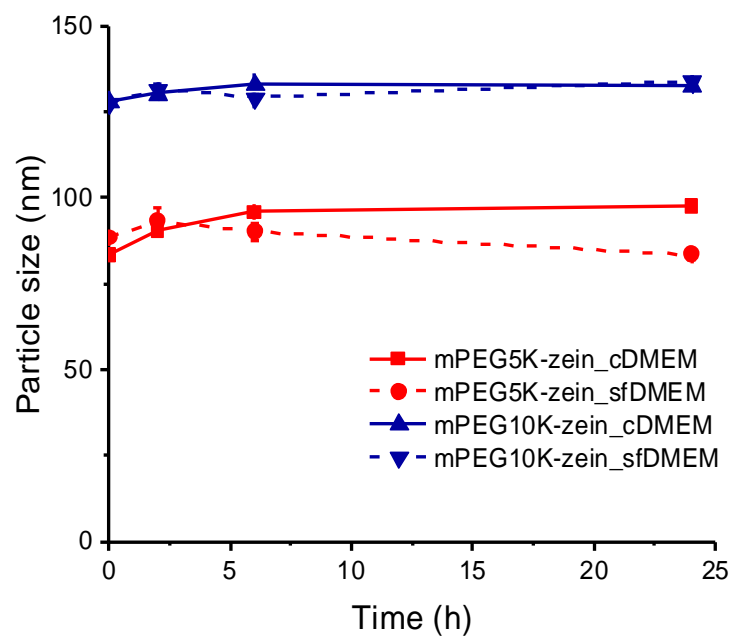

**Figure S3.** Size of mPEG5K-zein and mPEG10K-zein micelles in the presence or absence of 10% (v/v) FBS, over 24 h (“cDMEM”: complete DMEM medium, “sfDMEM”: serum-free DMEM medium) ( $n = 3$ ).

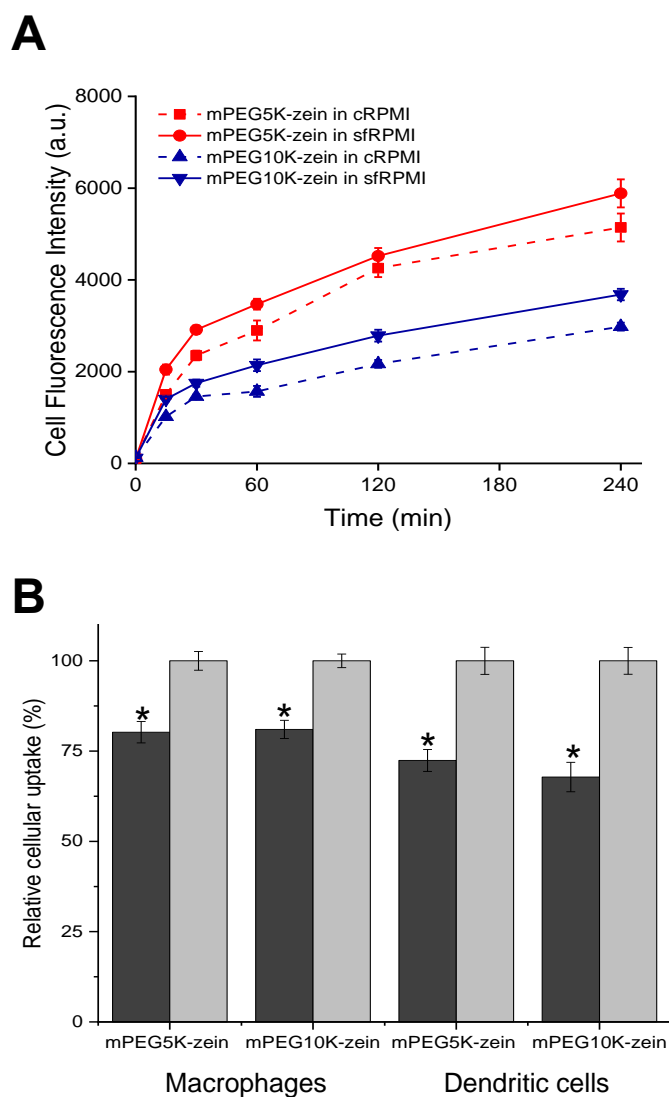

**Figure S4.** Effect of FBS on the cellular uptake of mPEG-zein micelles. Nile red-loaded mPEG5K-zein and mPEG10K-zein micelles were pre-incubated in complete medium or in serum-free medium at 37°C for 1 h, to allow protein adsorption to the surface of the micelles. A) Time-dependent uptake of the pre-formed corona micelles in complete and serum-free medium by B16-F10-luc-G5 cells (cRPMI: complete RPMI medium, sfRPMI: serum-free RPMI medium) ( $n = 3$ ). B) Cellular uptake of the pre-formed corona micelles in cRPMI (dark gray) or sfRPMI (light gray), by macrophages and dendritic cells ( $n = 6$ ) (\*:  $P < 0.05$ , compared with sfRPMI).

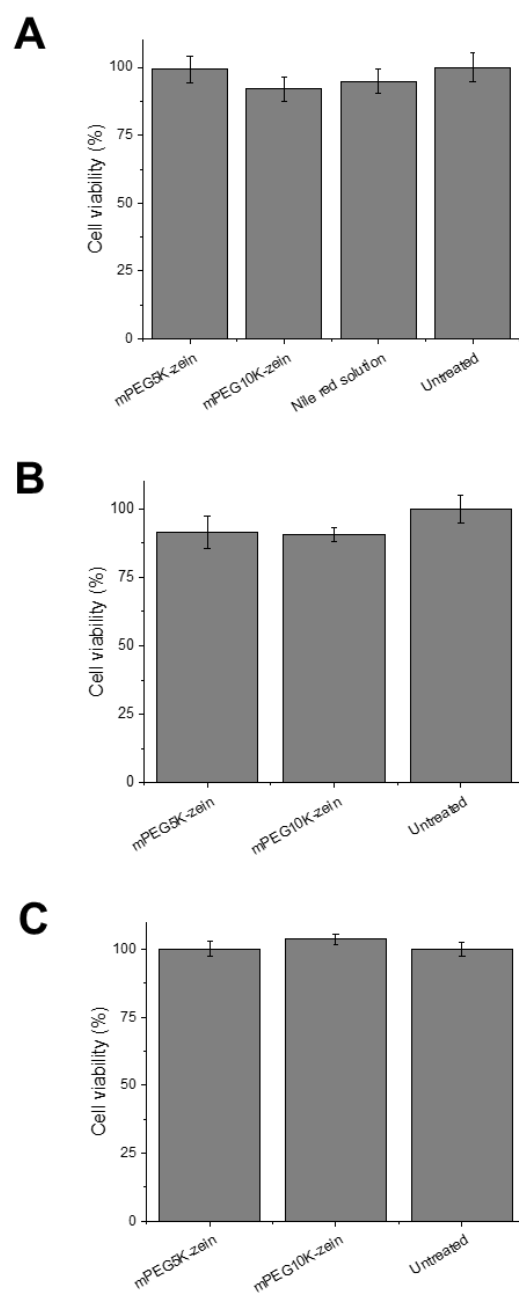

**Figure S5.** Viability of B16-F10-luc-G5 cancer cells (A), macrophages (B), and dendritic cells (C) treated with Nile red-loaded mPEG-zein micelles for 4 h ( $n = 15$ ) (cancer cells) or 2 h ( $n = 10$ ) (macrophages, dendritic cells) (controls: cells treated with Nile red solution, or left untreated). There was no statistical difference between the treatments.

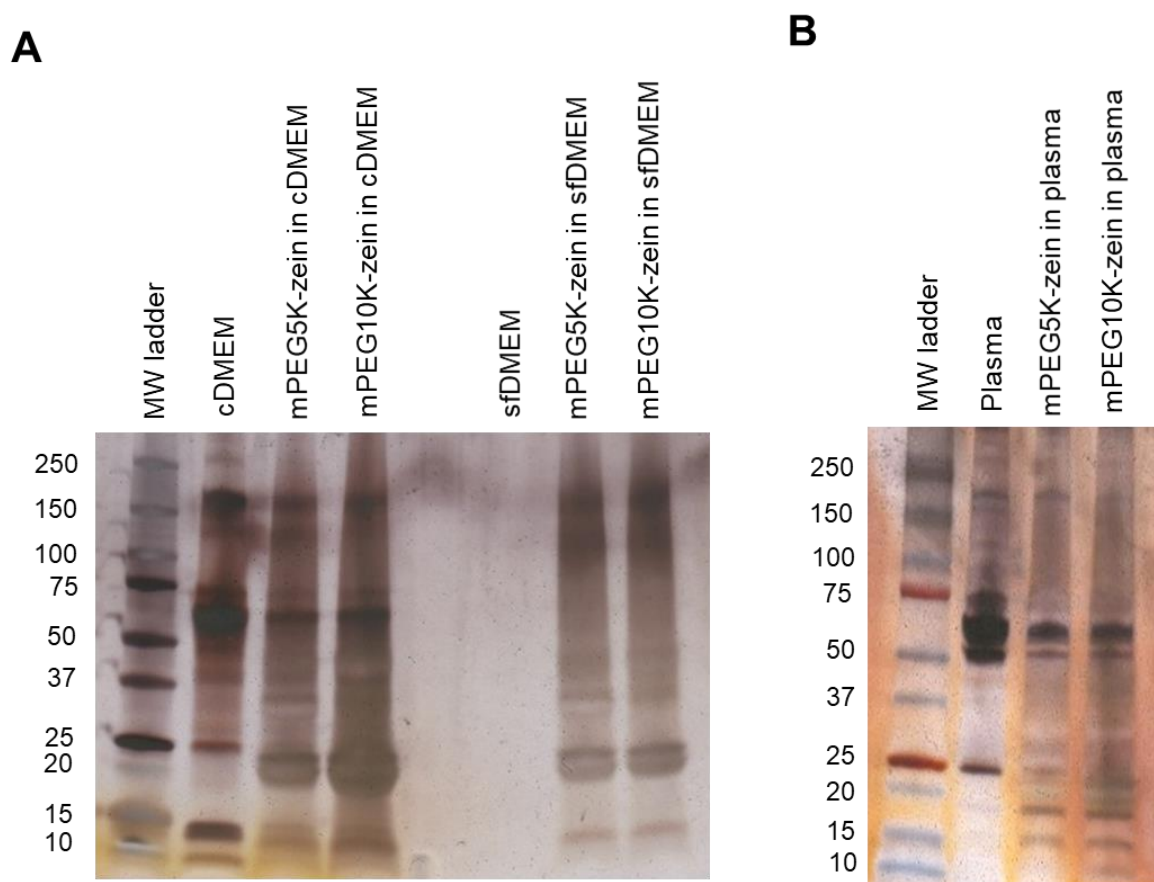

**Figure S6.** SDS-PAGE gels of protein corona surrounding mPEG-zein micelles following incubation in cDMEM, sfDMEM (A) and HP (B) at 37°C for 1 h. The analysis was performed in duplicate – for clarity only one replicate is shown. Protein bands at ~22-24 kDa correspond to  $\alpha$ -zein. Other zein fractions were also detected from micelles that have been incubated with sfDMEM. However, the intensities of these bands were considerably low.

**Table S1.** List of hard corona proteins on mPEG5K-zein and mPEG10K-zein micelles after exposure to human plasma at 37°C for 1 h (n.d.: not detected).

| Accession   | Description                                                                                                                 | Mass   | mPEG5K-zein |       | mPEG10K-zein |       |
|-------------|-----------------------------------------------------------------------------------------------------------------------------|--------|-------------|-------|--------------|-------|
|             |                                                                                                                             |        | Score       | emPAI | Score        | emPAI |
| NP_000468.1 | serum albumin preproprotein                                                                                                 | 71317  | 2765        | 5.74  | 2552         | 7.32  |
| CAH18185.1  | hypothetical protein (albumin)                                                                                              | 71353  | 2465        | 4.73  | 2204         | 6.46  |
| AAF69644.1  | PRO2675 (albumin)                                                                                                           | 33466  | n.d.        | n.d.  | 2093         | 13.73 |
| AFA52006.1  | keratin 1                                                                                                                   | 66197  | 2910        | 3.67  | 1097         | 2.93  |
| AAG41947.1  | keratin 1                                                                                                                   | 66198  | n.d.        | n.d.  | 1075         | 2.93  |
| NP_000414.2 | keratin, type II cytoskeletal 2 epidermal                                                                                   | 65678  | 1556        | 2.15  | n.d.         | n.d.  |
| AAC83410.1  | epidermal cytokeratin 2                                                                                                     | 66110  | n.d.        | n.d.  | 840          | 2.31  |
| AAC41769.1  | keratin type II                                                                                                             | 60448  | 549         | 0.87  | n.d.         | n.d.  |
| AAA59466.1  | keratin type II, partial                                                                                                    | 60258  | 538         | 0.76  | n.d.         | n.d.  |
| AAH69269.1  | Keratin 6A                                                                                                                  | 60323  | 497         | 0.87  | n.d.         | n.d.  |
| AAH24292.1  | Keratin 5                                                                                                                   | 62568  | 358         | 0.52  | 207          | 0.27  |
| NP_000217.2 | keratin, type I cytoskeletal 9                                                                                              | 62255  | 2741        | 1.8   | 158          | 0.35  |
| NP_000055.2 | complement C3 preproprotein                                                                                                 | 188569 | 2720        | 0.76  | 1405         | 0.94  |
| NP_000375.2 | apolipoprotein B-100 precursor                                                                                              | 516634 | 1721        | 0.22  | 812          | 0.27  |
| NP_000412.3 | keratin, type I cytoskeletal 10                                                                                             | 58994  | 1668        | 1.97  | 1173         | 3.64  |
| AAB35421.1  | type I keratin 16                                                                                                           | 51548  | 1094        | 1.59  | n.d.         | n.d.  |
| AAA59460.1  | keratin type 16                                                                                                             | 51010  | n.d.        | n.d.  | 97           | 0.25  |
| AAH02690.1  | Keratin 14                                                                                                                  | 51905  | 1009        | 0.92  | n.d.         | n.d.  |
| NP_705694.3 | keratin, type I cytoskeletal 13 isoform a                                                                                   | 49900  | 300         | 0.35  | n.d.         | n.d.  |
| BAG56970.1  | unnamed protein product                                                                                                     | 62862  | 53          | 0.13  | n.d.         | n.d.  |
| AMT74554.1  | immunoglobulin light chain VRC01c-HuGL, partial                                                                             | 18550  | 1494        | 5.03  | n.d.         | n.d.  |
| AMT74549.1  | immunoglobulin light chain VRC01c-HuGL, partial                                                                             | 18437  | 1282        | 5.1   | n.d.         | n.d.  |
| AMT74548.1  | immunoglobulin light chain VRC01c-HuGL, partial                                                                             | 18337  | 1232        | 4.03  | n.d.         | n.d.  |
| AAH73794.1  | Unknown (protein for MGC:88814)                                                                                             | 25236  | 1108        | 1.82  | 245          | 1.82  |
| 1RZ7_L      | Chain L, Crystal Structure Of Human Anti-Hiv-1 Gp120-Reactive Antibody 48d                                                  | 23285  | 1017        | 1.61  | n.d.         | n.d.  |
| AAB50880.1  | anitubulin IgG1 kappa VL chain (N-terminal) [human, serum, immunocytic sarcom patient PER isolate, Peptide Partial, 219 aa] | 24028  | 1001        | 1.54  | n.d.         | n.d.  |
| 5M6A_A      | Chain A, Crystal structure of cardiotoxic Bence-Jones light chain dimer H9                                                  | 22803  | 967         | 1.67  | n.d.         | n.d.  |
| AAF13225.1  | immunoglobulin lambda light chain, partial                                                                                  | 23197  | 962         | 2.07  | n.d.         | n.d.  |
| ABU90575.2  | immunoglobulin lambda 2 light chain, partial                                                                                | 23205  | 949         | 1.62  | n.d.         | n.d.  |
| ABU90604.1  | immunoglobulin kappa 1 light chain, partial                                                                                 | 23832  | 944         | 1.55  | n.d.         | n.d.  |
| AWH66747.1  | immunoglobulin light chain variable region, partial                                                                         | 11751  | 758         | 3.71  | n.d.         | n.d.  |
| BAC85363.1  | unnamed protein product                                                                                                     | 54372  | 659         | 0.52  | 521          | 0.41  |
| BAC85190.1  | unnamed protein product                                                                                                     | 56528  | 627         | 0.49  | n.d.         | n.d.  |



| Accession  | Description                                                                      | Mass  | mPEG5K-zein |       | mPEG10K-zein |       |
|------------|----------------------------------------------------------------------------------|-------|-------------|-------|--------------|-------|
|            |                                                                                  |       | Score       | emPAI | Score        | emPAI |
| BAC85349.1 | unnamed protein product                                                          | 54127 | 598         | 0.52  | n.d.         | n.d.  |
| BAC85432.1 | unnamed protein product                                                          | 54647 | n.d.        | n.d.  | 516          | 0.51  |
| ARA90391.1 | immunoglobulin heavy chain, partial                                              | 50906 | 524         | 0.81  | 337          | 0.94  |
| BAC85202.1 | unnamed protein product                                                          | 53997 | n.d.        | n.d.  | 260          | 1.01  |
| AAH28090.1 | IGL@ protein                                                                     | 25119 | n.d.        | n.d.  | 248          | 1.83  |
| AXN93649.1 | immunoglobulin gamma 1 constant region, partial                                  | 36582 | n.d.        | n.d.  | 198          | 1.27  |
| AAH70353.1 | IGL@ protein                                                                     | 25475 | n.d.        | n.d.  | 189          | 1.4   |
| AAT86037.2 | immunoglobulin mu light chain variable region, partial                           | 15959 | n.d.        | n.d.  | 168          | 1     |
| ANH09850.1 | immunoglobulin light chain variable region, partial                              | 11778 | n.d.        | n.d.  | 122          | 0.36  |
| P0DOX2.2   | Immunoglobulin alpha-2 heavy chain BUT                                           | 49816 | n.d.        | n.d.  | 113          | 0.25  |
| AAG00912.1 | recombinant IgG4 heavy chain, partial                                            | 43465 | n.d.        | n.d.  | 92           | 0.3   |
| AMB38464.1 | immunoglobulin heavy chain variable region, partial                              | 15667 | 502         | 1.56  | n.d.         | n.d.  |
| AAD30738.1 | immunoglobulin heavy chain variable region, partial                              | 13400 | n.d.        | n.d.  | 88           | 1.27  |
| AAS85877.1 | immunoglobulin heavy chain, partial                                              | 16502 | n.d.        | n.d.  | 88           | 0.95  |
| AIE56783.1 | immunoglobulin heavy chain variable region, partial                              | 10722 | n.d.        | n.d.  | 73           | 0.4   |
| CEF92697.1 | immunoglobulin heavy chain variable region, partial                              | 11472 | n.d.        | n.d.  | 62           | 1.6   |
| AAW69278.1 | anti-tetanus toxoid immunoglobulin light chain variable region, partial          | 11764 | 448         | 1.53  | n.d.         | n.d.  |
| AAF79136.1 | immunoglobulin light chain variable region, partial                              | 11739 | 418         | 0.86  | n.d.         | n.d.  |
| AAB59396.1 | immunoglobulin alpha-2 heavy chain, partial                                      | 37212 | 397         | 0.5   | n.d.         | n.d.  |
| CAA06862.1 | anti-(ED-B) scFV, partial                                                        | 25357 | 384         | 0.34  | n.d.         | n.d.  |
| ARA90390.1 | immunoglobulin heavy chain, partial                                              | 49976 | 355         | 0.97  | n.d.         | n.d.  |
| AAA19493.1 | immunoglobulin kappa light chain V-Jk4, partial                                  | 12914 | 324         | 1.35  | n.d.         | n.d.  |
| CAE45775.1 | hypothetical protein                                                             | 53011 | 312         | 0.89  | n.d.         | n.d.  |
| CAC43966.1 | immunoglobulin kappa light chain variable region, partial                        | 10855 | 303         | 0.95  | n.d.         | n.d.  |
| AAF79134.1 | immunoglobulin light chain variable region, partial                              | 12085 | 286         | 0.83  | n.d.         | n.d.  |
| AAA69737.1 | immunoglobulin light chain MRNA V-region, partial                                | 13916 | 223         | 1.21  | 38           | 0.3   |
| CAC85284.1 | anti-peptide/MHC complex HLA-A1/MAGE-A1 monoclonal antibody heavy chain, partial | 26902 | 221         | 0.74  | n.d.         | n.d.  |
| AAB59394.1 | immunoglobulin gamma-4 heavy chain, partial                                      | 36360 | 217         | 0.51  | n.d.         | n.d.  |
| BAJ52218.1 | immunoglobulin gamma heavy chain, partial                                        | 23913 | 213         | 0.87  | n.d.         | n.d.  |
| CAJ75491.1 | immunoglobulin lambda light chain, partial                                       | 11570 | 194         | 0.88  | n.d.         | n.d.  |
| ABA00093.1 | immunoglobulin epsilon heavy chain variable region, partial                      | 13187 | 173         | 0.74  | n.d.         | n.d.  |
| ABU90692.2 | immunoglobulin lambda 1 light chain, partial                                     | 23106 | 158         | 0.62  | n.d.         | n.d.  |
| AAY33400.1 | anti-rabies virus immunoglobulin light chain variable region, partial            | 11887 | 85          | 0.85  | n.d.         | n.d.  |
| AAD16751.1 | immunoglobulin lambda light chain variable region, partial                       | 11759 | 55          | 0.86  | n.d.         | n.d.  |

| Accession   | Description                                                                         | Mass   | mPEG5K-zein |       | mPEG10K-zein |       |
|-------------|-------------------------------------------------------------------------------------|--------|-------------|-------|--------------|-------|
|             |                                                                                     |        | Score       | emPAI | Score        | emPAI |
| NP_000499.1 | fibrinogen alpha chain isoform alpha-E preproprotein                                | 95656  | 1193        | 0.54  | 444          | 0.61  |
| NP_000005.2 | alpha-2-macroglobulin isoform a precursor                                           | 164614 | 990         | 0.32  | 763          | 0.38  |
| AAA87674.1  | immunoglobulin kappa light chain, partial                                           | 23727  | n.d.        | n.d.  | 683          | 2.5   |
| ADX66015.1  | immunoglobulin variable region, partial                                             | 15515  | n.d.        | n.d.  | 321          | 1.04  |
| NP_000286.3 | alpha-1-antitrypsin precursor                                                       | 46878  | 921         | 0.9   | 926          | 2.33  |
| AAA51546.1  | alpha-1-antitrypsin                                                                 | 46787  | n.d.        | n.d.  | 925          | 2.33  |
| AAH15642.1  | Serpin peptidase inhibitor, clade A (alpha-1 antiproteinase, antitrypsin), member 1 | 46850  | n.d.        | n.d.  | 923          | 2.33  |
| 3V83_A      | Chain A, The 2.1 Angstrom Crystal Structure Of Diferric Human Transferrin           | 79280  | 846         | 0.69  | 721          | 0.95  |
| NP_000032.1 | apolipoprotein E isoform b precursor                                                | 36246  | n.d.        | n.d.  | 686          | 1.81  |
| EAX03569.1  | hCG2001591                                                                          | 194140 | 802         | 0.29  | 1236         | 0.42  |
| AAB59397.1  | apolipoprotein E                                                                    | 36242  | 768         | 4.22  | n.d.         | n.d.  |
| NP_002209.2 | inter-alpha-trypsin inhibitor heavy chain H4 isoform 1 precursor                    | 103521 | 527         | 0.29  | 181          | 0.29  |
| NP_002017.1 | fibronectin isoform 3 preproprotein                                                 | 262656 | 501         | 0.06  | 303          | 0.07  |
| NP_000574.2 | vitamin D-binding protein isoform 1 precursor                                       | 54480  | n.d.        | n.d.  | 279          | 0.32  |
| NP_000030.1 | apolipoprotein A-I isoform 1 preproprotein                                          | 30759  | 480         | 2.81  | 779          | 4.49  |
| AAB22835.1  | apolipoprotein AI, apo AI [human, spleen, Peptide Mutant, 88 aa]                    | 10155  | 199         | 1.93  | 302          | 5     |
| AAA35545.1  | proapo-A-I protein                                                                  | 30745  | n.d.        | n.d.  | 740          | 4.49  |
| NP_001636.1 | apolipoprotein C-I precursor                                                        | 9326   | n.d.        | n.d.  | 53           | 0.47  |
| P0DOX6.2    | Immunoglobulin mu heavy chain OU                                                    | 64244  | 475         | 0.19  | n.d.         | n.d.  |
| NP_001076.2 | alpha-1-antichymotrypsin precursor                                                  | 47792  | 452         | 0.37  | 211          | 0.48  |
| NP_002207.2 | inter-alpha-trypsin inhibitor heavy chain H2 precursor                              | 106853 | 452         | 0.24  | 139          | 0.15  |
| NP_000482.3 | complement C1q subcomponent subunit B precursor                                     | 26933  | 443         | 0.51  | 180          | 0.15  |
| NP_001728.1 | complement component C9 preproprotein                                               | 64615  | n.d.        | n.d.  | 63           | 0.06  |
| NP_002206.2 | inter-alpha-trypsin inhibitor heavy chain H1 isoform a preproprotein                | 101782 | 355         | 0.16  | 321          | 0.2   |
| NP_000031.1 | apolipoprotein C-III precursor                                                      | 10846  | 330         | 0.4   | 201          | 1.72  |
| AAB32200.1  | apolipoprotein D, apoD                                                              | 28317  | 314         | 0.93  | 53           | 0.3   |
| NP_000168.1 | gelsolin isoform a precursor                                                        | 86043  | 259         | 0.14  | 34           | 0.04  |
| AGP00859.1  | immunoglobulin A heavy chain variable region, partial                               | 14039  | 226         | 0.3   | n.d.         | n.d.  |
| NP_005134.1 | haptoglobin isoform 1 preproprotein                                                 | 45861  | 215         | 0.64  | 126          | 0.28  |
| AAA58902.1  | Ig J-chain, partial                                                                 | 16041  | 214         | 0.26  | 75           | 0.26  |
| NP_001701.2 | complement factor B preproprotein                                                   | 86847  | 209         | 0.09  | 146          | 0.14  |
| EAW72575.1  | alpha-1-B glycoprotein                                                              | 54809  | 195         | 0.07  | n.d.         | n.d.  |
| NP_000020.1 | angiotensinogen preproprotein                                                       | 53406  | 194         | 0.15  | 111          | 0.15  |
| NP_000053.2 | plasma protease C1 inhibitor precursor                                              | 55347  | 181         | 0.15  | 48           | 0.07  |

| Accession   | Description                                                                | Mass   | mPEG5K-zein |       | mPEG10K-zein |       |
|-------------|----------------------------------------------------------------------------|--------|-------------|-------|--------------|-------|
|             |                                                                            |        | Score       | emPAI | Score        | emPAI |
| NP_000884.1 | kininogen-1 isoform 2 precursor                                            | 48936  | 172         | 0.17  | 55           | 0.17  |
| NP_000473.2 | apolipoprotein A-IV precursor                                              | 45344  | 172         | 0.39  | 192          | 0.94  |
| AAF00489.1  | hemoglobin beta subunit variant                                            | 16086  | 163         | 0.58  | n.d.         | n.d.  |
| BAA00124.1  | alpha-2-plasmin inhibitor precursor                                        | 54903  | 158         | 0.23  | n.d.         | n.d.  |
| BAB71575.1  | unnamed protein product                                                    | 25941  | 156         | 0.33  | 172          | 0.54  |
| NP_001725.1 | complement C1s subcomponent isoform 1 preproprotein                        | 78174  | 146         | 0.05  | 76           | 0.05  |
| EAX04934.1  | fibrinogen beta chain, isoform CRA_e                                       | 40167  | 124         | 0.21  | n.d.         | n.d.  |
| EAX04933.1  | fibrinogen beta chain, isoform CRA_d                                       | 52759  | n.d.        | n.d.  | 108          | 0.15  |
| 1TTC_A      | Chain A, Transthyretin                                                     | 13842  | 123         | 0.7   | n.d.         | n.d.  |
| NP_003652.2 | apolipoprotein L1 isoform a precursor                                      | 44004  | 111         | 0.09  | 94           | 0.09  |
| NP_000479.1 | antithrombin-III isoform 1 precursor                                       | 53025  | 110         | 0.15  | 201          | 0.53  |
| CAJ75478.1  | immunoglobulin heavy chain, partial                                        | 23826  | 105         | 0.17  | 60           | 0.17  |
| NP_001822.3 | clusterin preproprotein                                                    | 53031  | 104         | 0.24  | 179          | 0.33  |
| AAH34389.1  | Leucine-rich alpha-2-glycoprotein 1                                        | 38372  | 103         | 0.1   | 65           | 0.22  |
| AAI44239.1  | Peptidoglycan recognition protein 2                                        | 68683  | 97          | 0.06  | n.d.         | n.d.  |
| NP_000177.2 | complement factor H isoform a precursor                                    | 143654 | 95          | 0.05  | n.d.         | n.d.  |
| NP_006735.2 | retinol-binding protein 4 isoform a precursor                              | 23337  | 92          | 0.38  | n.d.         | n.d.  |
| NP_001176.1 | zinc-alpha-2-glycoprotein precursor                                        | 34465  | 90          | 0.12  | 63           | 0.12  |
| AME15468.1  | anti-HIV immunoglobulin heavy chain variable region, partial               | 13165  | 89          | 0.32  | n.d.         | n.d.  |
| AGR34115.1  | anti-HIV-1 immunoglobulin light chain variable region, partial             | 11208  | n.d.        | n.d.  | 44           | 0.38  |
| 3CU7_A      | Chain A, Human Complement Component 5                                      | 189911 | 88          | 0.04  | 39           | 0.02  |
| 1I5J_A      | Chain A, Nmr Structure Of Human Apolipoprotein C-li In The Presence Of Sds | 8909   | 83          | 0.5   | n.d.         | n.d.  |
| AHZ09405.1  | immunoglobulin light chain variable region, partial                        | 11334  | 83          | 0.9   | n.d.         | n.d.  |
| AFQ00545.1  | vitronectin, partial                                                       | 25596  | 82          | 0.16  | n.d.         | n.d.  |
| 1JMJ_A      | Chain A, Crystal Structure Of Native Heparin Cofactor li                   | 55096  | 77          | 0.07  | 62           | 0.15  |
| ANP95466.1  | vitamin D binding protein, partial                                         | 3612   | 71          | 5.19  | n.d.         | n.d.  |
| NP_000087.2 | ceruloplasmin precursor                                                    | 122997 | 68          | 0.03  | 28           | 0.03  |
| AGP00850.1  | immunoglobulin A heavy chain variable region, partial                      | 13407  | 67          | 0.31  | n.d.         | n.d.  |
| AIU95717.1  | immunoglobulin kappa light chain variable region, partial                  | 10697  | 66          | 0.41  | n.d.         | n.d.  |
| AAF03677.1  | apolipoprotein(a), partial                                                 | 12216  | 66          | 0.35  | n.d.         | n.d.  |
| AAA52173.1  | serum vitamin D-binding protein precursor                                  | 54612  | 65          | 0.15  | n.d.         | n.d.  |
| NP_006503.2 | serum amyloid A-4 protein precursor                                        | 14851  | 62          | 0.28  | n.d.         | n.d.  |
| NP_000437.3 | serum paraoxonase/arylesterase 1 precursor                                 | 39877  | 59          | 0.1   | 93           | 0.1   |
| NP_000706.1 | C4b-binding protein alpha chain precursor                                  | 69042  | 56          | 0.12  | n.d.         | n.d.  |
| NP_000500.2 | fibrinogen gamma chain isoform gamma-A precursor                           | 50092  | 47          | 0.08  | 73           | 0.35  |

| Accession      | Description                                                                    | Mass   | mPEG5K-zein |       | mPEG10K-zein |       |
|----------------|--------------------------------------------------------------------------------|--------|-------------|-------|--------------|-------|
|                |                                                                                |        | Score       | emPAI | Score        | emPAI |
| EAX01790.1     | solute carrier family 9 (sodium/hydrogen exchanger), member 4                  | 82210  | 44          | 0.05  | n.d.         | n.d.  |
| NP_001637.1    | apolipoprotein C-IV precursor                                                  | 14886  | 44          | 0.28  | n.d.         | n.d.  |
| AAS19424.1     | anti-SARS S protein immunoglobulin heavy chain variable region, partial        | 12738  | 44          | 0.33  | n.d.         | n.d.  |
| NP_000303.1    | vitamin K-dependent protein C preproprotein                                    | 53406  | 42          | 0.07  | n.d.         | n.d.  |
| AIZ06499.1     | immunoglobulin kappa chain variable region, partial                            | 10228  | 40          | 0.43  | n.d.         | n.d.  |
| BAS02858.1     | T cell receptor alpha chain V-J-region, partial                                | 7205   | 37          | 0.64  | 40           | 0.64  |
| NP_002640.2    | phosphatidylinositol 4,5-bisphosphate 3-kinase catalytic subunit gamma isoform | 127571 | 34          | 0.03  | n.d.         | n.d.  |
| EAW50979.1     | hCG1742973, partial                                                            | 17765  | 31          | 0.23  | n.d.         | n.d.  |
| EAW55766.1     | hCG1984886, isoform CRA_b, partial                                             | 24205  | 30          | 0.17  | n.d.         | n.d.  |
| EAX04766.1     | hCG2025928                                                                     | 18290  | 29          | 0.22  | n.d.         | n.d.  |
| AAH00539.2     | JMJD1B protein, partial                                                        | 173630 | 29          | 0.02  | n.d.         | n.d.  |
| EAW82627.1     | iduronidase, alpha-L-, isoform CRA_j                                           | 41521  | 27          | 0.09  | n.d.         | n.d.  |
| CAD39181.1     | hypothetical protein, partial                                                  | 52942  | 27          | 0.07  | n.d.         | n.d.  |
| ABO30676.1     | alpha-helix coiled-coil rod homologue, partial                                 | 13127  | 25          | 0.32  | n.d.         | n.d.  |
| AAB71646.1     | MHC class I chain-related protein, partial                                     | 36491  | 23          | 0.11  | n.d.         | n.d.  |
| NP_001013649.2 | NHS-like protein 2                                                             | 133831 | 23          | 0.03  | n.d.         | n.d.  |
| NP_004987.2    | multidrug resistance-associated protein 1                                      | 172907 | 22          | 0.02  | n.d.         | n.d.  |
| AAL08624.1     | NDR1-related protein NDR2                                                      | 41113  | 21          | 0.1   | n.d.         | n.d.  |
| CAC12843.1     | lipoxigenase-3                                                                 | 81856  | 20          | 0.05  | n.d.         | n.d.  |
| ABE97359.1     | anti-Rh(D) antibody immunoglobulin heavy chain variable region, partial        | 14624  | 20          | 0.29  | n.d.         | n.d.  |
| BAB14324.1     | unnamed protein product, partial                                               | 83252  | 19          | 0.05  | n.d.         | n.d.  |
| NP_001327.2    | cathepsin Z preproprotein                                                      | 34530  | 19          | 0.11  | n.d.         | n.d.  |
| EAW64299.1     | EF-hand domain family, member B, isoform CRA_a                                 | 130113 | 16          | 0.03  | n.d.         | n.d.  |
| CAB44857.1     | immunoglobulin mu heavy chain variable region, partial                         | 13201  | 16          | 0.32  | n.d.         | n.d.  |
| AAS01769.1     | monoclonal IgM antibody heavy chain                                            | 65126  | n.d.        | n.d.  | 244          | 0.42  |
| 1QWH_A         | Chain A, A Covalent Dimer Of Transthyretin That Affects The Amyloid Pathway    | 12836  | n.d.        | n.d.  | 217          | 2.11  |
| NP_001677.2    | ATP synthase subunit beta, mitochondrial precursor                             | 56525  | n.d.        | n.d.  | 105          | 0.14  |
| NP_000604.1    | hemopexin precursor                                                            | 52385  | n.d.        | n.d.  | 102          | 0.15  |
| NP_001624.1    | protein AMBP preproprotein                                                     | 39886  | n.d.        | n.d.  | 97           | 0.1   |
| NP_000629.3    | vitronectin precursor                                                          | 55069  | n.d.        | n.d.  | 94           | 0.15  |
| AAL07469.1     | alpha-1-B glycoprotein precursor                                               | 54746  | n.d.        | n.d.  | 72           | 0.07  |
| AAA35952.1     | beta-globin                                                                    | 19204  | n.d.        | n.d.  | 63           | 0.47  |
| NP_001077007.1 | POTE ankyrin domain family member E                                            | 122882 | n.d.        | n.d.  | 58           | 0.06  |

| Accession      | Description                                                                                          | Mass   | mPEG5K-zein |       | mPEG10K-zein |       |
|----------------|------------------------------------------------------------------------------------------------------|--------|-------------|-------|--------------|-------|
|                |                                                                                                      |        | Score       | emPAI | Score        | emPAI |
| NP_001630.1    | serum amyloid P-component precursor                                                                  | 25485  | n.d.        | n.d.  | 50           | 0.16  |
| NP_001613.2    | alpha-2-HS-glycoprotein isoform 2 preproprotein                                                      | 40114  | n.d.        | n.d.  | 50           | 0.1   |
| 1COH_A         | Chain A, Structure Of Haemoglobin In The Deoxy Quaternary State With Ligand Bound At The Alpha Haems | 15174  | n.d.        | n.d.  | 49           | 0.27  |
| EAX01470.1     | hCG23783, isoform CRA_a                                                                              | 23402  | n.d.        | n.d.  | 45           | 0.17  |
| BAG06714.1     | MYO5B variant protein                                                                                | 215218 | n.d.        | n.d.  | 45           | 0.02  |
| BAG58506.1     | unnamed protein product                                                                              | 113194 | n.d.        | n.d.  | 43           | 0.03  |
| NP_689497.1    | charged multivesicular body protein 4c                                                               | 26394  | n.d.        | n.d.  | 38           | 0.15  |
| AAG44663.1     | DC33                                                                                                 | 30040  | n.d.        | n.d.  | 38           | 0.28  |
| NP_003433.3    | zinc finger protein 143 isoform 1 [Homo sapiens]                                                     | 69709  | n.d.        | n.d.  | 36           | 0.06  |
| NP_001124.1    | afamin precursor                                                                                     | 70963  | n.d.        | n.d.  | 34           | 0.05  |
| SCW25082.1     | Activated tyrosine kinase PDGFRB                                                                     | 92437  | n.d.        | n.d.  | 34           | 0.04  |
| EAX06838.1     | Fas (TNFRSF6) associated factor 1, isoform CRA_b                                                     | 57089  | n.d.        | n.d.  | 33           | 0.07  |
| XP_011524065.1 | lethal(3)malignant brain tumor-like protein 4 isoform X6                                             | 60648  | n.d.        | n.d.  | 28           | 0.06  |
| BAG60995.1     | unnamed protein product                                                                              | 40215  | n.d.        | n.d.  | 27           | 0.1   |
| AAM15772.1     | interleukin-1 receptor associated kinase 4                                                           | 51925  | n.d.        | n.d.  | 26           | 0.08  |
| NP_005989.3    | T-complex protein 1 subunit gamma isoform a                                                          | 61066  | n.d.        | n.d.  | 22           | 0.06  |
| AAG44697.1     | DC37                                                                                                 | 32471  | n.d.        | n.d.  | 22           | 0.12  |
| CAD38880.1     | hypothetical protein                                                                                 | 58694  | n.d.        | n.d.  | 22           | 0.07  |
| EAW65837.1     | tetratricopeptide repeat domain 6, isoform CRA_a                                                     | 185766 | n.d.        | n.d.  | 22           | 0.02  |
| XP_011536666.1 | RNA-binding protein Musashi homolog 1 isoform X5                                                     | 28085  | n.d.        | n.d.  | 21           | 0.14  |
| AAI13880.1     | SH3 domain and tetratricopeptide repeats 2                                                           | 146697 | n.d.        | n.d.  | 19           | 0.03  |
| BAH11896.1     | unnamed protein product                                                                              | 17420  | n.d.        | n.d.  | 16           | 0.24  |
| AAT74746.1     | proteoglycan 4, partial                                                                              | 28812  | n.d.        | n.d.  | 15           | 0.14  |
